# Supplementary material for: Investigating the effect of CeO2 on the radical scavenging activity of Pt@CoOx/NC@CeO2 during the electrocatalytic oxygen reduction reaction in acidic and alkaline environments
Source: Royal Society of Chemistry journal article supplement (doi:10.1039/d4ma00041b), 2024-01-01
Supplement: d4ma00041b1.pdf [file d4ma00041b1.pdf]

## Supporting information

### Investigating the effect of CeO<sub>2</sub> on the radical scavenging activity of Pt@CoO<sub>x</sub>/NC@CeO<sub>2</sub> during the electrocatalytic oxygen reduction reaction in acidic and alkaline environments

Fatima Nasim,<sup>1</sup> Hassan Ali,<sup>1</sup> Amir Waseem,<sup>1</sup> and Muhammad Arif Nadeem<sup>1,2\*</sup>

<sup>1</sup>Department of Chemistry, Quaid-i-Azam University, Islamabad 45320, Pakistan

<sup>2</sup>Pakistan Academy of Sciences, 3-Constitution Avenue Sector G-5/2, Islamabad, Pakistan

\*Contact details:

M.A.N; [manadeem@qau.edu.pk](mailto:manadeem@qau.edu.pk)

#### Determination of electron number

For the determination of electron number, Koutechy-Levich (K-L) plots were drawn at different potentials from which electron number was calculated according to the formula given below.<sup>1</sup>

$$\frac{1}{j} = \frac{1}{jd} + \frac{1}{jk}$$

$$\frac{1}{j} = \frac{1}{B\sqrt{W}} + \frac{1}{jk}$$

$$jd = 0.62nFC_0 (D_0)^{2/3} (V)^{-1/6}$$

#### ECSA measurement

Electrochemical active surface area was calculated from palladium oxide layer reduction curve at potential limit of 1.4 V<sub>RHE</sub> according to the following formula.<sup>2</sup>

$$ECSA = \frac{Q_0}{q^0}$$

$Q^0$  = Charge contained in the CV curve

$q^0$  = standard value for Pd - based catalysts

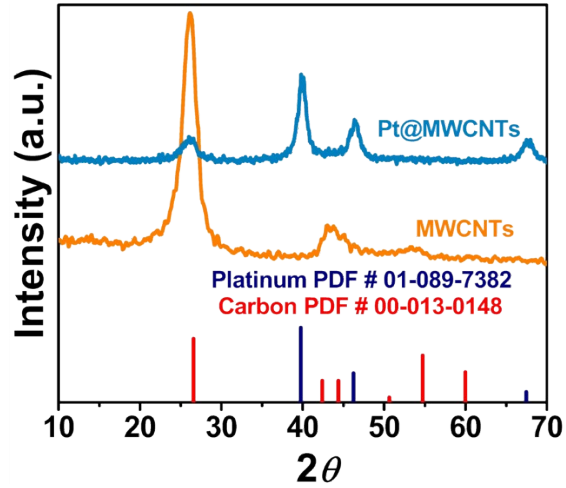

Figure S1. PXRD pattern of MWCNTs and Pt@MWCNTs1

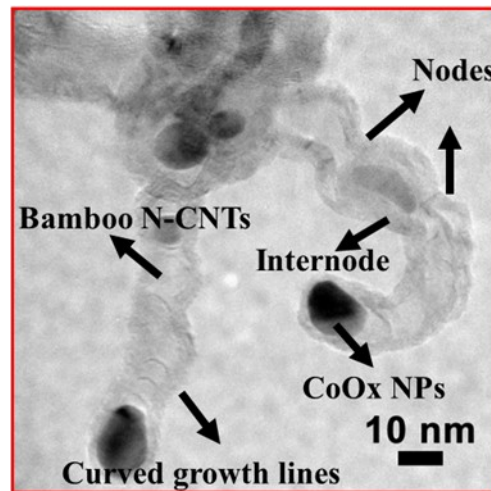

Figure S2. HRTEM image of CoOx/NC at 10 nm

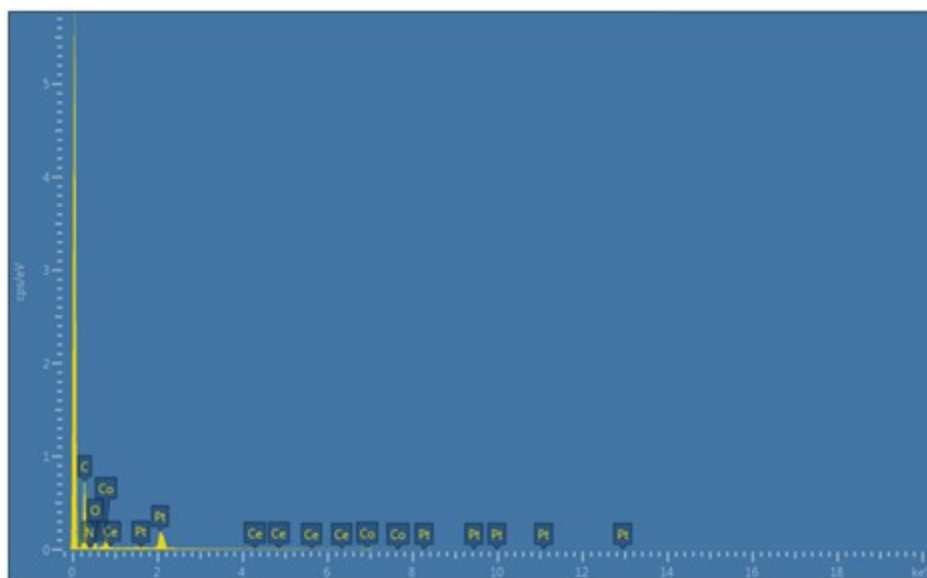

**Figure S3.** EDX analysis of Pt@CoOx/NC@CeO<sub>2</sub>.1

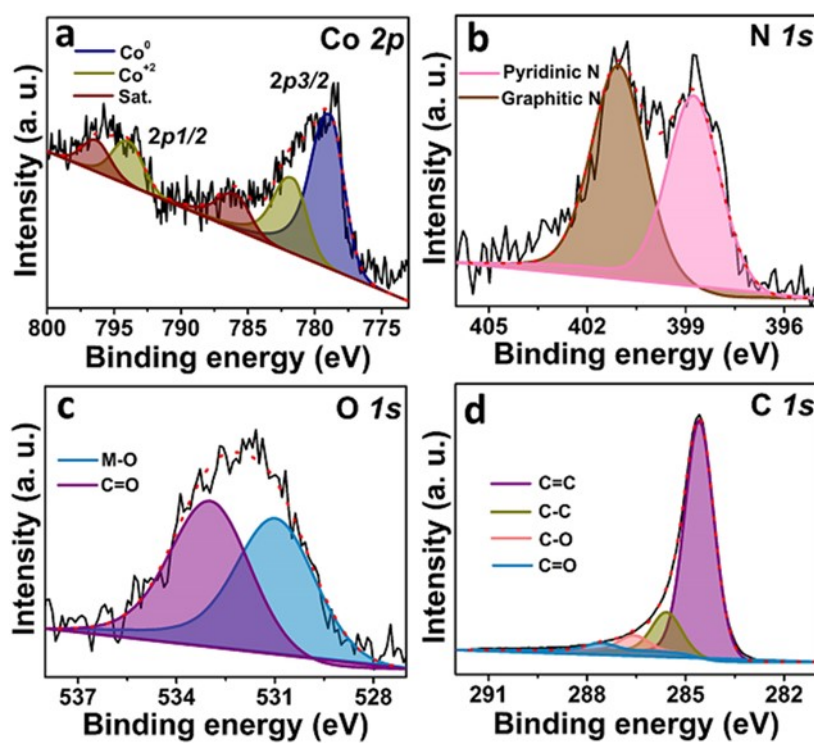

**Figure S4.** XPS spectrum of CoOx/NC (a) Co 2p (b) N 1s (c) O 1s (d) C 1s<sup>3</sup>

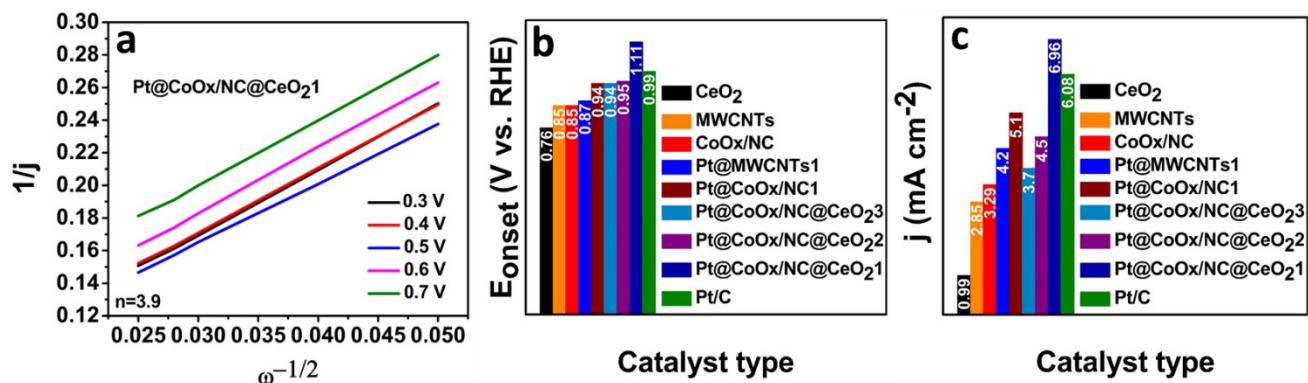

**Figure S5.** (a) K-L plot of Pt@CoOx/NC@CeO<sub>2</sub>1 in 0.1M KOH (b) comparison of E<sub>onset</sub> of the synthesized catalysts with 20 wt% Pt/C in 0.1M KOH (c) comparison of current density of the synthesized catalysts with 20 wt% Pt/C in 0.1M KOH

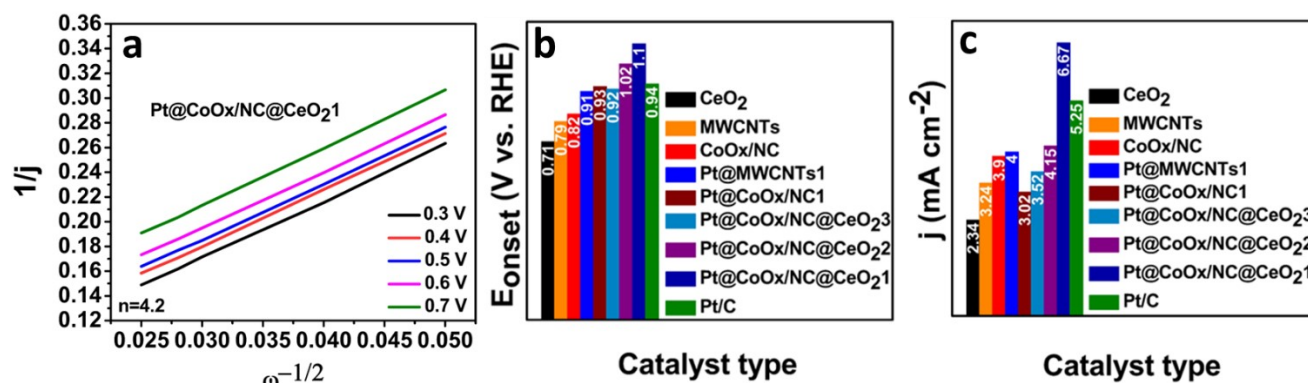

**Figure S6.** (a) K-L plot of Pt@CoOx/NC@CeO<sub>2</sub>1 in 0.1M HClO<sub>4</sub> (b) comparison of E<sub>onset</sub> of the synthesized catalysts with 20 wt% Pt/C in 0.1M HClO<sub>4</sub> (c) comparison of current density of the synthesized catalysts with 20 wt% Pt/C in 0.1M HClO<sub>4</sub>

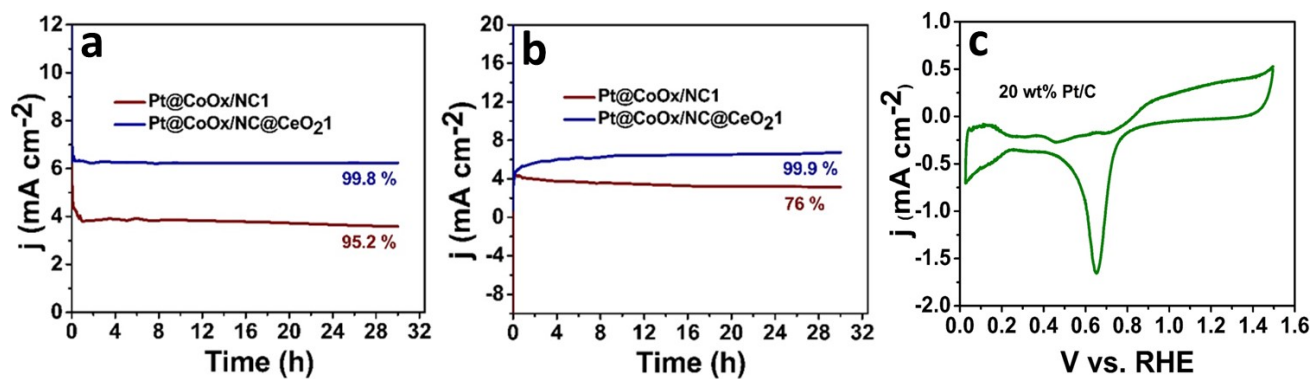

**Figure S7.** Chronoamperometric results of Pt@CoOx/NC1 and Pt@CoOx/NC@CeO<sub>2</sub>1 in 0.1 M KOH (b) chronoamperometric results of Pt@CoOx/NC1 and Pt@CoOx/NC@CeO<sub>2</sub>1 in 0.1 M HClO<sub>4</sub> (c) Pt-O layer reduction curve of 20 wt% Pt/C at 1.4 V<sub>RHE</sub> in 0.1 M HClO<sub>4</sub> at a scan rate of 50 mV s<sup>-1</sup> in Ar saturated environment

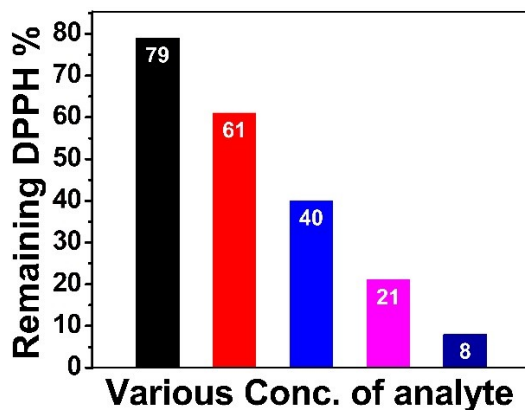

**Figure S8.** Remaining % of DPPH after being incubated with different concentrations of Pt@CoOx/NC@CeO<sub>2</sub>1

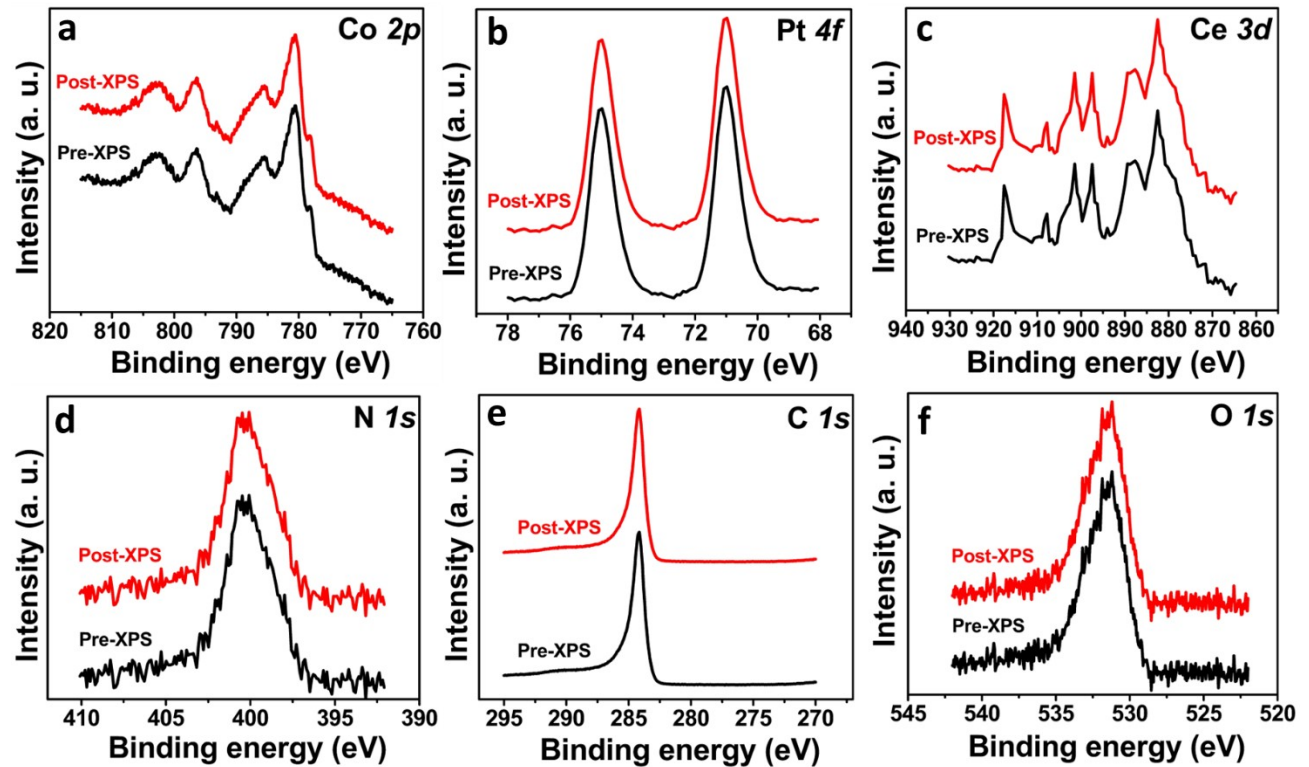

**Figure S9.** Comparison of Pre and Post XPS analysis of Pt@CoOx/NC@CeO<sub>2</sub>.1 after chronoamperometric measurements (a) Co 2p (b) Pt 4f (c) Ce 3d (d) N 1s (e) C 1s (f) O 1s

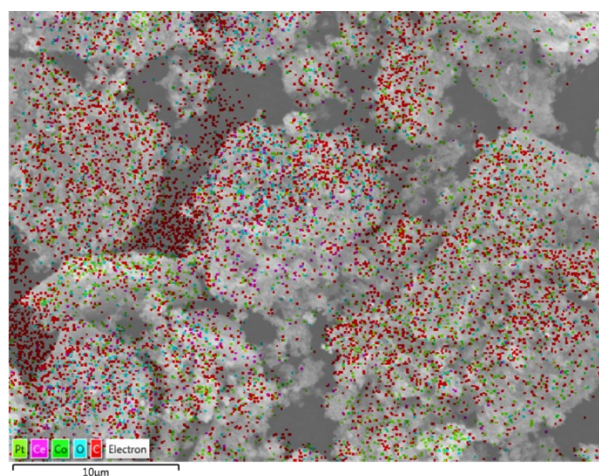

**Figure S10.** SEM analysis of Pt@CoOx/NC@CeO<sub>2</sub>.1 after chronoamperometric measurements

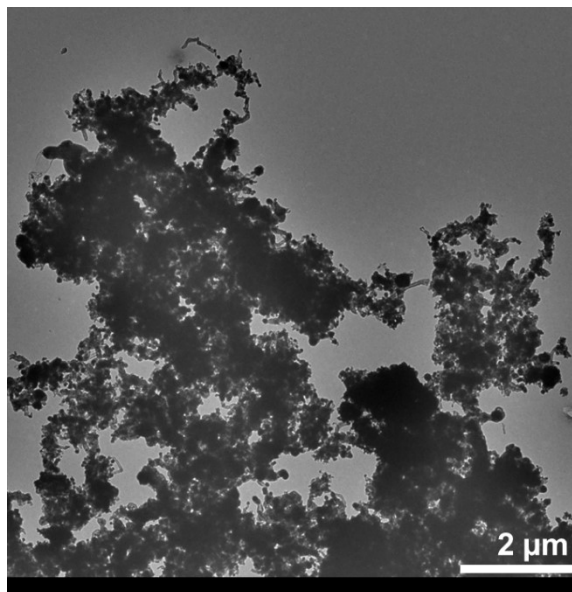

**Figure S11.** TEM analysis of Pt@CoO<sub>x</sub>/NC@CeO<sub>2.1</sub> after chronoamperometric measurements

## References

1. Khan, I. A.; Qian, Y.; Badshah, A.; Nadeem, M. A.; Zhao, D., Highly porous carbon derived from MOF-5 as a support of ORR electrocatalysts for fuel cells. *ACS Appl. Mater. Interfaces* **2016**, *8* (27), 17268-17275.
2. Fang, L.-l.; Tao, Q.; Li, M.-f.; Liao, L.-w.; Chen, D.; Chen, Y.-x., Determination of the real surface area of palladium electrode. *Chinese J. Chem. Phys.* **2010**, *23* (5), 543-548.
3. Khan, I.; Nasim, F.; Choucair, M.; Ullah, S.; Badshah, A.; Nadeem, M., Cobalt oxide nanoparticle embedded N-CNTs: lithium ion battery applications. *RSC Adv.* **2016**, *6* (2), 1129-1135.
